# Supplementary material
Source: PubMed Central journal article supplement (PMC2805450)
Supplement: NIHMS163344-supplement-01.pdf [file NIHMS163344-supplement-01.pdf]

**Supplementary Table 1** SNPs selected for genotyping

| SNP        | passed/failed | Chr | Position  | Band    | Gene(s) | Gene(s)5kb | Gene(s)10kb | T1D, T2D or autoimmune |
|------------|---------------|-----|-----------|---------|---------|------------|-------------|------------------------|
| rs2240340  | passed        | 1   | 17535226  | 1p36.13 | PADI4   | PADI4      | PADI4       | autoimmune             |
| rs1004819  | passed        | 1   | 67442801  | 1p31.3  | IL23R   | IL23R      | IL23R       | autoimmune             |
| rs11805303 | passed        | 1   | 67448104  | 1p31.3  | IL23R   | IL23R      | IL23R       | autoimmune             |
| rs7530511  | passed        | 1   | 67457975  | 1p31.3  | IL23R   | IL23R      | IL23R       | autoimmune             |
| rs11209026 | passed        | 1   | 67478546  | 1p31.3  | IL23R   | IL23R      | IL23R       | autoimmune             |
| rs11264799 | passed        | 1   | 155937381 | 1q23.1  | FCRL3   | FCRL3      | FCRL3       | autoimmune             |
| rs1800947  | passed        | 1   | 157950062 | 1q23.2  | CRP     | CRP        | CRP         | autoimmune             |
| rs12035082 | passed        | 1   | 171165000 | 1q24.3  |         |            |             | autoimmune             |
| rs1800896  | passed        | 1   | 205013520 | 1q32.1  |         | IL10       | IL10        | autoimmune             |
| rs2243158  | passed        | 1   | 205074264 | 1q32.1  | IL19    | IL19       | IL19        | autoimmune             |
| rs2243169  | failed        | 1   | 205076157 | 1q32.1  | IL19    | IL19       | IL19        | autoimmune             |
| rs2243188  | passed        | 1   | 205081095 | 1q32.1  | IL19    | IL19       | IL19        | autoimmune             |
| rs2981573  | passed        | 1   | 205107200 | 1q32.1  | IL20    | IL20       | IL20        | autoimmune             |
| rs2232360  | passed        | 1   | 205107282 | 1q32.1  | IL20    | IL20       | IL20        | autoimmune             |
| rs1800587  | failed        | 2   | 113259431 | 2q13    | IL1A    | IL1A       | IL1A        | autoimmune             |
| rs1143634  | failed        | 2   | 113306861 | 2q13    | IL1B    | IL1B       | IL1B        | autoimmune             |
| rs7574865  | failed        | 2   | 191672878 | 2q32.3  | STAT4   | STAT4      | STAT4       | autoimmune             |
| rs231819   | passed        | 2   | 204380782 | 2q33.2  |         |            |             | T1D                    |
| rs231839   | passed        | 2   | 204390518 | 2q33.2  |         |            |             | T1D                    |
| rs1018361  | failed        | 2   | 204393080 | 2q33.2  |         |            |             | T1D                    |
| rs231749   | failed        | 2   | 204395763 | 2q33.2  |         |            |             | T1D                    |
| rs721      | passed        | 2   | 204395957 | 2q33.2  |         |            |             | T1D                    |
| rs6745050  | passed        | 2   | 204399783 | 2q33.2  |         |            |             | T1D                    |
| rs11571308 | passed        | 2   | 204402596 | 2q33.2  |         |            |             | T1D                    |
| rs12990970 | passed        | 2   | 204408934 | 2q33.2  |         |            |             | T1D                    |
| rs231793   | failed        | 2   | 204410588 | 2q33.2  |         |            |             | T1D                    |

**Supplementary Table 1** Continued

| SNP        | passed/failed | Chr | Position  | Band   | Gene(s)            | Gene(s)5kb                   | Gene(s)10kb                  | T1D, T2D or autoimmune |
|------------|---------------|-----|-----------|--------|--------------------|------------------------------|------------------------------|------------------------|
| rs11571315 | passed        | 2   | 204439146 | 2q33.2 |                    | CTLA4                        | CTLA4                        | T1D                    |
| rs16840252 | passed        | 2   | 204439764 | 2q33.2 |                    | CTLA4                        | CTLA4                        | T1D                    |
| rs11571317 | passed        | 2   | 204440253 | 2q33.2 |                    | CTLA4                        | CTLA4                        | T1D                    |
| rs231777   | passed        | 2   | 204441833 | 2q33.2 | CTLA4              | CTLA4                        | CTLA4                        | T1D                    |
| rs231727   | passed        | 2   | 204449795 | 2q33.2 |                    | CTLA4                        | CTLA4                        | T1D                    |
| rs11571300 | passed        | 2   | 204455012 | 2q33.2 |                    |                              | CTLA4                        | T1D                    |
| rs10197319 | passed        | 2   | 204471289 | 2q33.2 |                    |                              |                              | T1D                    |
| rs11571311 | passed        | 2   | 204481924 | 2q33.2 |                    |                              |                              | T1D                    |
| rs17268364 | passed        | 2   | 204486063 | 2q33.2 |                    |                              |                              | T1D                    |
| rs7597297  | failed        | 2   | 204486339 | 2q33.2 |                    |                              |                              | T1D                    |
| rs6752680  | passed        | 2   | 204487250 | 2q33.2 |                    |                              |                              | T1D                    |
| rs4294983  | passed        | 2   | 204503039 | 2q33.2 |                    |                              | ICOS                         | T1D                    |
| rs11883722 | failed        | 2   | 204509090 | 2q33.2 |                    | ICOS                         | ICOS                         | T1D                    |
| rs4355090  | failed        | 2   | 204524627 | 2q33.2 | ICOS               | ICOS                         | ICOS                         | T1D                    |
| rs4521021  | passed        | 2   | 204524820 | 2q33.2 | ICOS               | ICOS                         | ICOS                         | T1D                    |
| rs10172036 | passed        | 2   | 204532528 | 2q33.2 | ICOS               | ICOS                         | ICOS                         | T1D                    |
| rs10932037 | passed        | 2   | 204533591 | 2q33.2 | ICOS               | ICOS                         | ICOS                         | T1D                    |
| rs1559931  | failed        | 2   | 204533974 | 2q33.2 | ICOS               | ICOS                         | ICOS                         | T1D                    |
| rs1896286  | failed        | 2   | 204540683 | 2q33.2 |                    |                              | ICOS                         | T1D                    |
| rs3181212  | passed        | 2   | 218636818 | 2q35   | RUFY4<br>LOC729808 | RUFY4<br>IL8RBP<br>LOC729808 | RUFY4<br>IL8RBP<br>LOC729808 | autoimmune             |
| rs12471723 | passed        | 2   | 218639794 | 2q35   | RUFY4<br>LOC729808 | RUFY4<br>LOC729808           | RUFY4<br>IL8RBP<br>LOC729808 | autoimmune             |
| rs13385042 | passed        | 2   | 218643544 | 2q35   | RUFY4              | RUFY4<br>LOC729808           | RUFY4<br>IL8RBP<br>LOC729808 | autoimmune             |
| rs4074801  | passed        | 2   | 218644086 | 2q35   | RUFY4              | RUFY4<br>LOC729808           | RUFY4<br>IL8RBP<br>LOC729808 | autoimmune             |
| rs4674246  | passed        | 2   | 218648663 | 2q35   | RUFY4              | RUFY4                        | RUFY4<br>LOC729808           | autoimmune             |

**Supplementary Table 1** Continued

| SNP        | passed/failed | Chr | Position  | Band | Gene(s)        | Gene(s)5kb     | Gene(s)10kb         | T1D, T2D or autoimmune |
|------------|---------------|-----|-----------|------|----------------|----------------|---------------------|------------------------|
| rs6759925  | passed        | 2   | 218649340 | 2q35 | RUFY4          | RUFY4          | RUFY4<br>LOC729808  | autoimmune             |
| rs6436025  | passed        | 2   | 218651093 | 2q35 | RUFY4          | RUFY4          | RUFY4<br>LOC729808  | autoimmune             |
| rs4133195  | failed        | 2   | 218659490 | 2q35 | RUFY4          | RUFY4          | RUFY4               | autoimmune             |
| rs7422358  | passed        | 2   | 218661023 | 2q35 | RUFY4          | RUFY4          | RUFY4               | autoimmune             |
| rs6761387  | passed        | 2   | 218704798 | 2q35 | IL8RB          | IL8RB          | IL8RB               | autoimmune             |
| rs3092968  | passed        | 2   | 218735269 | 2q35 |                | IL8RA          | IL8RA               | autoimmune             |
| rs4674269  | failed        | 2   | 218759036 | 2q35 |                |                |                     | autoimmune             |
| rs13026485 | failed        | 2   | 218766229 | 2q35 |                |                |                     | autoimmune             |
| rs10932761 | passed        | 2   | 218772636 | 2q35 |                |                |                     | autoimmune             |
| rs13403276 | passed        | 2   | 218789542 | 2q35 |                | ARPC2          | ARPC2               | autoimmune             |
| rs17572109 | passed        | 2   | 218802179 | 2q35 | ARPC2          | ARPC2          | ARPC2               | autoimmune             |
| rs17462354 | passed        | 2   | 218818127 | 2q35 | ARPC2          | ARPC2          | ARPC2               | autoimmune             |
| rs6738394  | passed        | 2   | 218818870 | 2q35 | ARPC2          | ARPC2          | ARPC2               | autoimmune             |
| rs2292550  | failed        | 2   | 218848532 | 2q35 | PNKD<br>TMBIM1 | PNKD<br>TMBIM1 | AAMP PNKD<br>TMBIM1 | autoimmune             |
| rs3731861  | passed        | 2   | 218899500 | 2q35 | PNKD           | PNKD           | PNKD                | autoimmune             |
| rs10932775 | passed        | 2   | 218904043 | 2q35 | PNKD           | PNKD           | PNKD                | autoimmune             |
| rs7587403  | passed        | 2   | 218906667 | 2q35 | PNKD           | PNKD           | PNKD                | autoimmune             |
| rs9076     | passed        | 2   | 218919025 | 2q35 | PNKD           | PNKD           | PNKD                | autoimmune             |
| rs4324314  | failed        | 2   | 218930090 | 2q35 | C2orf62        | C2orf62        | C2orf62             | autoimmune             |
| rs6745037  | failed        | 2   | 218938006 | 2q35 | C2orf62        | C2orf62        | C2orf62             | autoimmune             |
| rs6745172  | passed        | 2   | 218938086 | 2q35 | C2orf62        | C2orf62        | C2orf62             | autoimmune             |
| rs7586267  | failed        | 2   | 218941696 | 2q35 |                | C2orf62        | C2orf62             | autoimmune             |
| rs11904786 | failed        | 2   | 218946982 | 2q35 |                |                | C2orf62<br>SLC11A1  | autoimmune             |
| rs4674301  | passed        | 2   | 218951106 | 2q35 |                | SLC11A1        | SLC11A1             | autoimmune             |
| rs2276631  | passed        | 2   | 218957257 | 2q35 | SLC11A1        | SLC11A1        | SLC11A1             | autoimmune             |
| rs3731863  | passed        | 2   | 218960452 | 2q35 | SLC11A1        | SLC11A1        | SLC11A1             | autoimmune             |

**Supplementary Table 1** Continued

| SNP        | passed/failed | Chr | Position  | Band    | Gene(s)            | Gene(s)5kb         | Gene(s)10kb        | T1D, T2D or autoimmune |
|------------|---------------|-----|-----------|---------|--------------------|--------------------|--------------------|------------------------|
| rs2290708  | passed        | 2   | 218960621 | 2q35    | SLC11A1            | SLC11A1            | SLC11A1            | autoimmune             |
| rs2695343  | passed        | 2   | 218963667 | 2q35    | SLC11A1            | SLC11A1            | CTDSP1<br>SLC11A1  | autoimmune             |
| rs1059823  | passed        | 2   | 218968088 | 2q35    | SLC11A1            | CTDSP1<br>SLC11A1  | CTDSP1<br>SLC11A1  | autoimmune             |
| rs13062    | failed        | 2   | 218968895 | 2q35    | SLC11A1            | CTDSP1<br>SLC11A1  | CTDSP1<br>SLC11A1  | autoimmune             |
| rs2227251  | failed        | 2   | 218974667 | 2q35    | CTDSP1             | CTDSP1<br>SLC11A1  | CTDSP1<br>SLC11A1  | autoimmune             |
| rs2227255  | passed        | 2   | 218976025 | 2q35    | CTDSP1             | CTDSP1             | CTDSP1<br>SLC11A1  | autoimmune             |
| rs7607369  | passed        | 2   | 218987341 | 2q35    |                    | VIL1               | CTDSP1 VIL1        | autoimmune             |
| rs13391398 | failed        | 2   | 218990673 | 2q35    |                    | VIL1               | VIL1               | autoimmune             |
| rs10210302 | failed        | 2   | 233823578 | 2q37.1  |                    | ATG16L1            | ATG16L1            | autoimmune             |
| rs2241880  | passed        | 2   | 233848107 | 2q37.1  | ATG16L1            | ATG16L1<br>SCARNA5 | ATG16L1<br>SCARNA5 | autoimmune             |
| rs1801282  | passed        | 3   | 12368125  | 3p25.2  | PPARG              | PPARG              | PPARG              | T2D                    |
| rs9858542  | passed        | 3   | 49676987  | 3p21.31 | BSN                | BSN                | APEH BSN           | autoimmune             |
| rs651630   | failed        | 3   | 126294004 | 3q21.2  | SLC12A8            | SLC12A8            | SLC12A8            | autoimmune             |
| rs4383556  | failed        | 3   | 186867167 | 3q27.2  | IGF2BP2            | IGF2BP2            | IGF2BP2            | T2D                    |
| rs6770227  | passed        | 3   | 186891464 | 3q27.2  | IGF2BP2            | IGF2BP2            | IGF2BP2            | T2D                    |
| rs750753   | passed        | 3   | 186904341 | 3q27.2  | IGF2BP2            | IGF2BP2            | IGF2BP2<br>C3orf65 | T2D                    |
| rs7609665  | passed        | 3   | 186908670 | 3q27.2  | IGF2BP2            | IGF2BP2            | IGF2BP2<br>C3orf65 | T2D                    |
| rs9877179  | failed        | 3   | 186909187 | 3q27.2  | IGF2BP2            | IGF2BP2<br>C3orf65 | IGF2BP2<br>C3orf65 | T2D                    |
| rs6780264  | passed        | 3   | 186915327 | 3q27.2  | IGF2BP2<br>C3orf65 | IGF2BP2<br>C3orf65 | IGF2BP2<br>C3orf65 | T2D                    |
| rs6777038  | passed        | 3   | 186923654 | 3q27.2  | IGF2BP2<br>C3orf65 | IGF2BP2<br>C3orf65 | IGF2BP2<br>C3orf65 | T2D                    |
| rs2290066  | failed        | 3   | 186928536 | 3q27.2  | IGF2BP2<br>C3orf65 | IGF2BP2<br>C3orf65 | IGF2BP2<br>C3orf65 | T2D                    |
| rs12635769 | passed        | 3   | 186929732 | 3q27.2  | IGF2BP2<br>C3orf65 | IGF2BP2<br>C3orf65 | IGF2BP2<br>C3orf65 | T2D                    |



**Supplementary Table 1** Continued

| SNP        | passed/failed | Chr | Position  | Band   | Gene(s) | Gene(s)5kb | Gene(s)10kb        | T1D, T2D or autoimmune |
|------------|---------------|-----|-----------|--------|---------|------------|--------------------|------------------------|
| rs9850770  | failed        | 3   | 186937538 | 3q27.2 | IGF2BP2 | IGF2BP2    | IGF2BP2<br>C3orf65 | T2D                    |
| rs10804901 | failed        | 3   | 186938375 | 3q27.2 | IGF2BP2 | IGF2BP2    | IGF2BP2<br>C3orf65 | T2D                    |
| rs13076013 | passed        | 3   | 186947182 | 3q27.2 | IGF2BP2 | IGF2BP2    | IGF2BP2            | T2D                    |
| rs6766313  | failed        | 3   | 186950326 | 3q27.2 | IGF2BP2 | IGF2BP2    | IGF2BP2            | T2D                    |
| rs4686692  | failed        | 3   | 186963762 | 3q27.2 | IGF2BP2 | IGF2BP2    | IGF2BP2            | T2D                    |
| rs7621192  | failed        | 3   | 186968901 | 3q27.2 | IGF2BP2 | IGF2BP2    | IGF2BP2            | T2D                    |
| rs16860219 | failed        | 3   | 186976284 | 3q27.2 | IGF2BP2 | IGF2BP2    | IGF2BP2            | T2D                    |
| rs7634540  | passed        | 3   | 186994182 | 3q27.2 | IGF2BP2 | IGF2BP2    | IGF2BP2            | T2D                    |
| rs4402960  | passed        | 3   | 186994381 | 3q27.2 | IGF2BP2 | IGF2BP2    | IGF2BP2            | T2D                    |
| rs11708719 | passed        | 3   | 186997968 | 3q27.2 | IGF2BP2 | IGF2BP2    | IGF2BP2            | T2D                    |
| rs6767577  | passed        | 3   | 187003426 | 3q27.2 | IGF2BP2 | IGF2BP2    | IGF2BP2            | T2D                    |
| rs1470579  | failed        | 3   | 187011774 | 3q27.2 | IGF2BP2 | IGF2BP2    | IGF2BP2            | T2D                    |
| rs1374910  | failed        | 3   | 187014355 | 3q27.2 | IGF2BP2 | IGF2BP2    | IGF2BP2            | T2D                    |
| rs752854   | passed        | 4   | 6332862   | 4p16.1 | WFS1    | WFS1       | WFS1               | T2D                    |
| rs16853571 | passed        | 4   | 41447887  | 4p13   |         | PHOX2B     | PHOX2B             | autoimmune             |
| rs2141036  | failed        | 4   | 72750521  | 4q13.3 |         |            |                    | autoimmune             |
| rs13150933 | passed        | 4   | 72750727  | 4q13.3 |         |            |                    | autoimmune             |
| rs722513   | passed        | 4   | 72760658  | 4q13.3 |         |            |                    | autoimmune             |
| rs6822876  | failed        | 4   | 72776085  | 4q13.3 |         |            |                    | autoimmune             |
| rs7673438  | passed        | 4   | 72781049  | 4q13.3 |         |            |                    | autoimmune             |
| rs394295   | passed        | 4   | 72794499  | 4q13.3 |         |            |                    | autoimmune             |
| rs1526692  | passed        | 4   | 72797588  | 4q13.3 |         |            |                    | autoimmune             |
| rs16846880 | passed        | 4   | 72813429  | 4q13.3 |         |            |                    | autoimmune             |
| rs12512631 | passed        | 4   | 72820195  | 4q13.3 |         |            | GC                 | autoimmune             |
| rs17383291 | failed        | 4   | 72824274  | 4q13.3 |         | GC         | GC                 | autoimmune             |
| rs705117   | passed        | 4   | 72826979  | 4q13.3 | GC      | GC         | GC                 | autoimmune             |
| rs3755967  | failed        | 4   | 72828262  | 4q13.3 | GC      | GC         | GC                 | autoimmune             |

**Supplementary Table 1** Continued

| SNP        | passed/failed | Chr | Position  | Band   | Gene(s) | Gene(s)5kb | Gene(s)10kb | T1D, T2D or autoimmune |
|------------|---------------|-----|-----------|--------|---------|------------|-------------|------------------------|
| rs12640179 | passed        | 4   | 72831551  | 4q13.3 | GC      | GC         | GC          | autoimmune             |
| rs7041     | failed        | 4   | 72837198  | 4q13.3 | GC      | GC         | GC          | autoimmune             |
| rs222016   | failed        | 4   | 72853839  | 4q13.3 | GC      | GC         | GC          | autoimmune             |
| rs16847054 | passed        | 4   | 72887823  | 4q13.3 | GC      | GC         | GC          | autoimmune             |
| rs16847086 | passed        | 4   | 72907080  | 4q13.3 |         |            |             | autoimmune             |
| rs842872   | passed        | 4   | 72913923  | 4q13.3 |         |            |             | autoimmune             |
| rs10518092 | passed        | 4   | 72915689  | 4q13.3 |         |            |             | autoimmune             |
| rs9992215  | failed        | 4   | 72919611  | 4q13.3 |         |            |             | autoimmune             |
| rs6823308  | failed        | 4   | 72921883  | 4q13.3 |         |            |             | autoimmune             |
| rs962225   | failed        | 4   | 72926220  | 4q13.3 |         |            |             | autoimmune             |
| rs7681566  | passed        | 4   | 72928444  | 4q13.3 |         |            |             | autoimmune             |
| rs13150628 | failed        | 4   | 72932410  | 4q13.3 |         |            |             | autoimmune             |
| rs13123547 | passed        | 4   | 123082586 | 4q27   | TRPC3   | TRPC3      | TRPC3       | T1D                    |
| rs4833780  | failed        | 4   | 123087643 | 4q27   | TRPC3   | TRPC3      | TRPC3       | T1D                    |
| rs7659353  | failed        | 4   | 123097821 | 4q27   |         |            | TRPC3       | T1D                    |
| rs4001038  | passed        | 4   | 123105690 | 4q27   |         |            |             | T1D                    |
| rs10032994 | passed        | 4   | 123112641 | 4q27   |         |            |             | T1D                    |
| rs6838639  | passed        | 4   | 123118615 | 4q27   |         |            |             | T1D                    |
| rs13109219 | passed        | 4   | 123119979 | 4q27   |         |            |             | T1D                    |
| rs9999992  | passed        | 4   | 123121534 | 4q27   |         |            |             | T1D                    |
| rs11098653 | passed        | 4   | 123122540 | 4q27   |         |            |             | T1D                    |
| rs13130390 | passed        | 4   | 123122656 | 4q27   |         |            |             | T1D                    |
| rs7672750  | passed        | 4   | 123127576 | 4q27   |         |            |             | T1D                    |
| rs4833240  | failed        | 4   | 123128394 | 4q27   |         |            |             | T1D                    |
| rs11098654 | failed        | 4   | 123128865 | 4q27   |         |            |             | T1D                    |
| rs1526920  | passed        | 4   | 123130691 | 4q27   |         |            |             | T1D                    |
| rs17596104 | failed        | 4   | 123143686 | 4q27   |         |            |             | T1D                    |
| rs1918179  | failed        | 4   | 123151592 | 4q27   |         |            |             | T1D                    |

**Supplementary Table 1** Continued

| SNP        | passed/failed | Chr | Position  | Band | Gene(s)  | Gene(s)5kb | Gene(s)10kb | T1D, T2D or autoimmune |
|------------|---------------|-----|-----------|------|----------|------------|-------------|------------------------|
| rs4833241  | failed        | 4   | 123153141 | 4q27 |          |            |             | T1D                    |
| rs10004294 | failed        | 4   | 123168502 | 4q27 |          |            |             | T1D                    |
| rs1526915  | failed        | 4   | 123178762 | 4q27 |          |            |             | T1D                    |
| rs12650119 | failed        | 4   | 123182262 | 4q27 |          |            |             | T1D                    |
| rs2390275  | passed        | 4   | 123186834 | 4q27 |          |            |             | T1D                    |
| rs4240266  | passed        | 4   | 123193044 | 4q27 |          |            |             | T1D                    |
| rs10516614 | failed        | 4   | 123193143 | 4q27 |          |            |             | T1D                    |
| rs6840372  | passed        | 4   | 123198294 | 4q27 |          |            |             | T1D                    |
| rs12510683 | passed        | 4   | 123199089 | 4q27 |          |            |             | T1D                    |
| rs7661311  | passed        | 4   | 123201709 | 4q27 |          |            |             | T1D                    |
| rs1880864  | passed        | 4   | 123206638 | 4q27 |          |            |             | T1D                    |
| rs4833808  | failed        | 4   | 123211949 | 4q27 |          |            |             | T1D                    |
| rs1949946  | passed        | 4   | 123219411 | 4q27 |          |            |             | T1D                    |
| rs13107397 | passed        | 4   | 123220301 | 4q27 |          |            |             | T1D                    |
| rs13118075 | passed        | 4   | 123227966 | 4q27 |          |            |             | T1D                    |
| rs4279237  | passed        | 4   | 123228624 | 4q27 |          |            |             | T1D                    |
| rs11931332 | passed        | 4   | 123236177 | 4q27 |          |            |             | T1D                    |
| rs3115227  | failed        | 4   | 123240337 | 4q27 |          |            |             | T1D                    |
| rs12152645 | failed        | 4   | 123242656 | 4q27 |          |            |             | T1D                    |
| rs6534338  | failed        | 4   | 123246319 | 4q27 |          |            |             | T1D                    |
| rs2892988  | passed        | 4   | 123273347 | 4q27 |          |            |             | T1D                    |
| rs13151961 | passed        | 4   | 123334952 | 4q27 | KIAA1109 | KIAA1109   | KIAA1109    | T1D                    |
| rs6827444  | passed        | 4   | 123352628 | 4q27 | KIAA1109 | KIAA1109   | KIAA1109    | T1D                    |
| rs6854090  | passed        | 4   | 123384863 | 4q27 | KIAA1109 | KIAA1109   | KIAA1109    | T1D                    |
| rs13119723 | failed        | 4   | 123437763 | 4q27 | KIAA1109 | KIAA1109   | KIAA1109    | T1D                    |
| rs7693745  | failed        | 4   | 123455033 | 4q27 | KIAA1109 | KIAA1109   | KIAA1109    | T1D                    |
| rs1127348  | failed        | 4   | 123500310 | 4q27 | KIAA1109 | KIAA1109   | KIAA1109    | T1D                    |
| rs17005693 | failed        | 4   | 123500743 | 4q27 | KIAA1109 | KIAA1109   | KIAA1109    | T1D                    |

**Supplementary Table 1** Continued

| SNP        | passed/failed | Chr | Position  | Band   | Gene(s) | Gene(s)5kb | Gene(s)10kb | T1D, T2D or autoimmune |
|------------|---------------|-----|-----------|--------|---------|------------|-------------|------------------------|
| rs6853169  | passed        | 4   | 123537515 | 4q27   | ADAD1   | ADAD1      | ADAD1       | T1D                    |
| rs12499753 | failed        | 4   | 123552627 | 4q27   | ADAD1   | ADAD1      | ADAD1       | T1D                    |
| rs11732095 | failed        | 4   | 123567795 | 4q27   | ADAD1   | ADAD1      | ADAD1       | T1D                    |
| rs4833248  | failed        | 4   | 123599855 | 4q27   |         | IL2        | IL2         | T1D                    |
| rs4833832  | failed        | 4   | 123676077 | 4q27   |         |            |             | T1D                    |
| rs976184   | passed        | 4   | 123742121 | 4q27   | IL21    | IL21       | IL21        | T1D                    |
| rs907715   | failed        | 4   | 123754503 | 4q27   | IL21    | IL21       | IL21        | T1D                    |
| rs13143866 | passed        | 4   | 123760208 | 4q27   | IL21    | IL21       | IL21        | T1D                    |
| rs4295278  | failed        | 4   | 123766991 | 4q27   |         |            | IL21        | T1D                    |
| rs4833838  | failed        | 4   | 123770148 | 4q27   |         |            | IL21        | T1D                    |
| rs10518402 | passed        | 4   | 123774240 | 4q27   |         |            |             | T1D                    |
| rs13137822 | failed        | 4   | 123776686 | 4q27   |         |            |             | T1D                    |
| rs2137497  | passed        | 4   | 123777704 | 4q27   |         |            |             | T1D                    |
| rs2390352  | failed        | 4   | 123777780 | 4q27   |         |            |             | T1D                    |
| rs7687094  | passed        | 4   | 123779802 | 4q27   |         |            |             | T1D                    |
| rs1022234  | failed        | 4   | 123782528 | 4q27   |         |            |             | T1D                    |
| rs6419221  | failed        | 4   | 123783569 | 4q27   |         |            |             | T1D                    |
| rs1533236  | passed        | 4   | 123783908 | 4q27   |         |            |             | T1D                    |
| rs13110000 | failed        | 4   | 123797510 | 4q27   |         |            |             | T1D                    |
| rs12511287 | passed        | 4   | 123797981 | 4q27   |         |            |             | T1D                    |
| rs10518400 | passed        | 4   | 123801876 | 4q27   |         |            |             | T1D                    |
| rs13147359 | passed        | 4   | 123816621 | 4q27   |         |            |             | T1D                    |
| rs7664318  | passed        | 4   | 123818574 | 4q27   |         |            |             | T1D                    |
| rs7705904  | passed        | 5   | 35811415  | 5p13.2 | SPEF2   | SPEF2      | SPEF2       | autoimmune             |
| rs11749262 | failed        | 5   | 35811996  | 5p13.2 | SPEF2   | SPEF2      | SPEF2       | autoimmune             |
| rs4869631  | passed        | 5   | 35812824  | 5p13.2 | SPEF2   | SPEF2      | SPEF2       | autoimmune             |
| rs10941263 | passed        | 5   | 35817192  | 5p13.2 | SPEF2   | SPEF2      | SPEF2       | autoimmune             |
| rs4869476  | passed        | 5   | 35819783  | 5p13.2 | SPEF2   | SPEF2      | SPEF2       | autoimmune             |



**Supplementary Table 1** Continued

| SNP        | passed/failed | Chr | Position | Band   | Gene(s) | Gene(s)5kb | Gene(s)10kb | T1D, T2D or autoimmune |
|------------|---------------|-----|----------|--------|---------|------------|-------------|------------------------|
| rs10058955 | failed        | 5   | 35823630 | 5p13.2 | SPEF2   | SPEF2      | SPEF2       | autoimmune             |
| rs2201409  | passed        | 5   | 35834439 | 5p13.2 | SPEF2   | SPEF2      | SPEF2       | autoimmune             |
| rs3822735  | passed        | 5   | 35835751 | 5p13.2 | SPEF2   | SPEF2      | SPEF2       | autoimmune             |
| rs2361394  | passed        | 5   | 35836304 | 5p13.2 | SPEF2   | SPEF2      | SPEF2       | autoimmune             |
| rs10050755 | passed        | 5   | 35836882 | 5p13.2 | SPEF2   | SPEF2      | SPEF2       | autoimmune             |
| rs10155582 | passed        | 5   | 35840482 | 5p13.2 | SPEF2   | SPEF2      | SPEF2       | autoimmune             |
| rs12521860 | passed        | 5   | 35849862 | 5p13.2 | SPEF2   | SPEF2      | SPEF2       | autoimmune             |
| rs6869232  | passed        | 5   | 35854904 | 5p13.2 |         | SPEF2      | SPEF2       | autoimmune             |
| rs11746643 | failed        | 5   | 35869474 | 5p13.2 |         |            |             | autoimmune             |
| rs12697352 | passed        | 5   | 35872991 | 5p13.2 |         |            |             | autoimmune             |
| rs975433   | failed        | 5   | 35874533 | 5p13.2 |         |            |             | autoimmune             |
| rs1353251  | passed        | 5   | 35892964 | 5p13.2 | IL7R    | IL7R       | IL7R        | autoimmune             |
| rs11567697 | failed        | 5   | 35894081 | 5p13.2 | IL7R    | IL7R       | IL7R        | autoimmune             |
| rs7711202  | failed        | 5   | 35902687 | 5p13.2 | IL7R    | IL7R       | IL7R        | autoimmune             |
| rs11567751 | passed        | 5   | 35907441 | 5p13.2 | IL7R    | IL7R       | IL7R        | autoimmune             |
| rs6897932  | passed        | 5   | 35910332 | 5p13.2 | IL7R    | IL7R       | IL7R        | autoimmune             |
| rs3194051  | passed        | 5   | 35912031 | 5p13.2 | IL7R    | IL7R       | IL7R        | autoimmune             |
| rs10063294 | failed        | 5   | 35913262 | 5p13.2 | IL7R    | IL7R       | IL7R        | autoimmune             |
| rs11957503 | passed        | 5   | 35918933 | 5p13.2 |         | IL7R       | IL7R        | autoimmune             |
| rs10214237 | passed        | 5   | 35919491 | 5p13.2 |         | IL7R       | IL7R        | autoimmune             |
| rs1445898  | failed        | 5   | 35946286 | 5p13.2 | CAPSL   | CAPSL      | CAPSL       | autoimmune             |
| rs4024109  | failed        | 5   | 35955375 | 5p13.2 | CAPSL   | CAPSL      | CAPSL       | autoimmune             |
| rs852252   | failed        | 5   | 35956309 | 5p13.2 | CAPSL   | CAPSL      | CAPSL       | autoimmune             |
| rs852250   | passed        | 5   | 35958697 | 5p13.2 | CAPSL   | CAPSL      | CAPSL       | autoimmune             |
| rs6897339  | passed        | 5   | 35961039 | 5p13.2 | CAPSL   | CAPSL      | CAPSL       | autoimmune             |
| rs11948151 | passed        | 5   | 35962098 | 5p13.2 | CAPSL   | CAPSL      | CAPSL       | autoimmune             |
| rs700174   | passed        | 5   | 35968960 | 5p13.2 | CAPSL   | CAPSL      | CAPSL       | autoimmune             |
| rs2289878  | passed        | 5   | 35975534 | 5p13.2 |         | CAPSL      | CAPSL       | autoimmune             |

**Supplementary Table 1** Continued

| SNP        | passed/failed | Chr | Position | Band   | Gene(s)          | Gene(s)5kb       | Gene(s)10kb      | T1D, T2D or autoimmune |
|------------|---------------|-----|----------|--------|------------------|------------------|------------------|------------------------|
| rs10472267 | failed        | 5   | 35976122 | 5p13.2 |                  | CAPSL            | CAPSL            | autoimmune             |
| rs17313031 | failed        | 5   | 35978112 | 5p13.2 |                  | CAPSL            | CAPSL            | autoimmune             |
| rs852234   | failed        | 5   | 35983393 | 5p13.2 |                  |                  | UGT3A1<br>CAPSL  | autoimmune             |
| rs10045685 | passed        | 5   | 35989454 | 5p13.2 | UGT3A1           | UGT3A1           | UGT3A1           | autoimmune             |
| rs17313606 | passed        | 5   | 35989985 | 5p13.2 | UGT3A1           | UGT3A1           | UGT3A1           | autoimmune             |
| rs700162   | passed        | 5   | 35999264 | 5p13.2 | UGT3A1           | UGT3A1           | UGT3A1           | autoimmune             |
| rs10472991 | passed        | 5   | 36000043 | 5p13.2 | UGT3A1           | UGT3A1           | UGT3A1           | autoimmune             |
| rs10040617 | failed        | 5   | 36002438 | 5p13.2 | UGT3A1           | UGT3A1           | UGT3A1           | autoimmune             |
| rs4869450  | passed        | 5   | 36004600 | 5p13.2 | UGT3A1           | UGT3A1           | UGT3A1           | autoimmune             |
| rs1122533  | passed        | 5   | 36005016 | 5p13.2 | UGT3A1           | UGT3A1           | UGT3A1           | autoimmune             |
| rs10512634 | failed        | 5   | 36023308 | 5p13.2 | UGT3A1           | UGT3A1           | UGT3A1           | autoimmune             |
| rs16902679 | passed        | 5   | 36028378 | 5p13.2 | UGT3A1           | UGT3A1           | UGT3A1           | autoimmune             |
| rs7715372  | failed        | 5   | 36038974 | 5p13.2 | UGT3A1           | UGT3A1           | UGT3A1           | autoimmune             |
| rs11738231 | passed        | 5   | 36050403 | 5p13.2 | UGT3A1           | UGT3A1           | UGT3A1           | autoimmune             |
| rs2447876  | passed        | 5   | 36063957 | 5p13.2 | UGT3A1           | UGT3A1           | UGT3A1<br>UGT3A2 | autoimmune             |
| rs3912137  | passed        | 5   | 36069777 | 5p13.2 | UGT3A1           | UGT3A1<br>UGT3A2 | UGT3A1<br>UGT3A2 | autoimmune             |
| rs6451254  | failed        | 5   | 36072035 | 5p13.2 | UGT3A1<br>UGT3A2 | UGT3A1<br>UGT3A2 | UGT3A1<br>UGT3A2 | autoimmune             |
| rs2289876  | passed        | 5   | 36074074 | 5p13.2 | UGT3A1<br>UGT3A2 | UGT3A1<br>UGT3A2 | UGT3A1<br>UGT3A2 | autoimmune             |
| rs1287277  | failed        | 5   | 36083276 | 5p13.2 | UGT3A1<br>UGT3A2 | UGT3A1<br>UGT3A2 | UGT3A1<br>UGT3A2 | autoimmune             |
| rs1287276  | failed        | 5   | 36083458 | 5p13.2 | UGT3A1<br>UGT3A2 | UGT3A1<br>UGT3A2 | UGT3A1<br>UGT3A2 | autoimmune             |
| rs1353269  | passed        | 5   | 36083590 | 5p13.2 | UGT3A1<br>UGT3A2 | UGT3A1<br>UGT3A2 | UGT3A1<br>UGT3A2 | autoimmune             |
| rs1287262  | failed        | 5   | 36092985 | 5p13.2 | UGT3A2           | UGT3A2           | UGT3A1<br>UGT3A2 | autoimmune             |
| rs1287260  | passed        | 5   | 36094908 | 5p13.2 | UGT3A2           | UGT3A2           | UGT3A1<br>UGT3A2 | autoimmune             |
| rs17234657 | passed        | 5   | 40437266 | 5p13.1 |                  |                  |                  | autoimmune             |

**Supplementary Table 1** Continued

| SNP        | passed/failed | Chr | Position  | Band   | Gene(s)   | Gene(s)5kb | Gene(s)10kb      | T1D, T2D or autoimmune |
|------------|---------------|-----|-----------|--------|-----------|------------|------------------|------------------------|
| rs1373692  | passed        | 5   | 40466940  | 5p13.1 |           |            |                  | T1D                    |
| rs9292777  | passed        | 5   | 40473705  | 5p13.1 |           |            |                  | T1D                    |
| rs3792876  | passed        | 5   | 131665208 | 5q31.1 | SLC22A4   | SLC22A4    | SLC22A4<br>P4HA2 | autoimmune             |
| rs2073838  | passed        | 5   | 131677121 | 5q31.1 | SLC22A4   | SLC22A4    | SLC22A4          | autoimmune             |
| rs1050152  | passed        | 5   | 131704219 | 5q31.1 | SLC22A4   | SLC22A4    | SLC22A4          | autoimmune             |
| rs11739135 | failed        | 5   | 131761296 | 5q31.1 |           | SLC22A5    | SLC22A5          | autoimmune             |
| rs6596075  | failed        | 5   | 131770127 | 5q31.1 |           | LOC441108  | LOC441108        | autoimmune             |
| rs10077785 | passed        | 5   | 131829057 | 5q31.1 | LOC441108 | LOC441108  | LOC441108        | autoimmune             |
| rs249611   | passed        | 5   | 133492556 | 5q31.1 | TCF7      | TCF7       | TCF7             | autoimmune             |
| rs13361189 | passed        | 5   | 150203580 | 5q33.1 |           | IRGM       | IRGM             | autoimmune             |
| rs4958847  | passed        | 5   | 150219780 | 5q33.1 |           |            |                  | autoimmune             |
| rs1000113  | passed        | 5   | 150220269 | 5q33.1 |           |            |                  | autoimmune             |
| rs3212227  | passed        | 5   | 158675528 | 5q33.3 | IL12B     | IL12B      | IL12B            | autoimmune             |
| rs10045431 | failed        | 5   | 158747111 | 5q33.3 |           |            |                  | autoimmune             |
| rs6887695  | failed        | 5   | 158755223 | 5q33.3 |           |            |                  | autoimmune             |
| rs12200871 | passed        | 6   | 20649085  | 6p22.3 | CDKAL1    | CDKAL1     | CDKAL1           | T2D                    |
| rs9366354  | failed        | 6   | 20653447  | 6p22.3 | CDKAL1    | CDKAL1     | CDKAL1           | T2D                    |
| rs9465803  | failed        | 6   | 20658822  | 6p22.3 | CDKAL1    | CDKAL1     | CDKAL1           | T2D                    |
| rs13199421 | failed        | 6   | 20664190  | 6p22.3 | CDKAL1    | CDKAL1     | CDKAL1           | T2D                    |
| rs9350258  | failed        | 6   | 20664884  | 6p22.3 | CDKAL1    | CDKAL1     | CDKAL1           | T2D                    |
| rs13203450 | passed        | 6   | 20673935  | 6p22.3 | CDKAL1    | CDKAL1     | CDKAL1           | T2D                    |
| rs4291090  | failed        | 6   | 20678018  | 6p22.3 | CDKAL1    | CDKAL1     | CDKAL1           | T2D                    |
| rs962576   | passed        | 6   | 20682568  | 6p22.3 | CDKAL1    | CDKAL1     | CDKAL1           | T2D                    |
| rs12213132 | passed        | 6   | 20694018  | 6p22.3 | CDKAL1    | CDKAL1     | CDKAL1           | T2D                    |
| rs6907767  | failed        | 6   | 20697320  | 6p22.3 | CDKAL1    | CDKAL1     | CDKAL1           | T2D                    |
| rs12204865 | passed        | 6   | 20709388  | 6p22.3 | CDKAL1    | CDKAL1     | CDKAL1           | T2D                    |
| rs9356740  | passed        | 6   | 20722693  | 6p22.3 | CDKAL1    | CDKAL1     | CDKAL1           | T2D                    |
| rs2065     | failed        | 6   | 20725499  | 6p22.3 | CDKAL1    | CDKAL1     | CDKAL1           | T2D                    |

**Supplementary Table 1** Continued

| SNP        | passed/failed | Chr | Position | Band   | Gene(s) | Gene(s)5kb | Gene(s)10kb | T1D, T2D or autoimmune |
|------------|---------------|-----|----------|--------|---------|------------|-------------|------------------------|
| rs9368214  | passed        | 6   | 20727809 | 6p22.3 | CDKAL1  | CDKAL1     | CDKAL1      | T2D                    |
| rs1569660  | passed        | 6   | 20730732 | 6p22.3 | CDKAL1  | CDKAL1     | CDKAL1      | T2D                    |
| rs9465838  | passed        | 6   | 20733470 | 6p22.3 | CDKAL1  | CDKAL1     | CDKAL1      | T2D                    |
| rs6917583  | passed        | 6   | 20734361 | 6p22.3 | CDKAL1  | CDKAL1     | CDKAL1      | T2D                    |
| rs4515379  | failed        | 6   | 20735420 | 6p22.3 | CDKAL1  | CDKAL1     | CDKAL1      | T2D                    |
| rs13194407 | failed        | 6   | 20738932 | 6p22.3 | CDKAL1  | CDKAL1     | CDKAL1      | T2D                    |
| rs17823073 | passed        | 6   | 20741024 | 6p22.3 | CDKAL1  | CDKAL1     | CDKAL1      | T2D                    |
| rs9460538  | failed        | 6   | 20748516 | 6p22.3 | CDKAL1  | CDKAL1     | CDKAL1      | T2D                    |
| rs7739974  | passed        | 6   | 20754049 | 6p22.3 | CDKAL1  | CDKAL1     | CDKAL1      | T2D                    |
| rs9460540  | passed        | 6   | 20756741 | 6p22.3 | CDKAL1  | CDKAL1     | CDKAL1      | T2D                    |
| rs6456364  | failed        | 6   | 20757233 | 6p22.3 | CDKAL1  | CDKAL1     | CDKAL1      | T2D                    |
| rs9295475  | passed        | 6   | 20760744 | 6p22.3 | CDKAL1  | CDKAL1     | CDKAL1      | T2D                    |
| rs16884072 | passed        | 6   | 20763482 | 6p22.3 | CDKAL1  | CDKAL1     | CDKAL1      | T2D                    |
| rs6456369  | passed        | 6   | 20768344 | 6p22.3 | CDKAL1  | CDKAL1     | CDKAL1      | T2D                    |
| rs10946398 | failed        | 6   | 20769013 | 6p22.3 | CDKAL1  | CDKAL1     | CDKAL1      | T2D                    |
| rs9358356  | passed        | 6   | 20775361 | 6p22.3 | CDKAL1  | CDKAL1     | CDKAL1      | T2D                    |
| rs9350270  | failed        | 6   | 20775778 | 6p22.3 | CDKAL1  | CDKAL1     | CDKAL1      | T2D                    |
| rs12527373 | passed        | 6   | 20779261 | 6p22.3 | CDKAL1  | CDKAL1     | CDKAL1      | T2D                    |
| rs4712528  | passed        | 6   | 20786409 | 6p22.3 | CDKAL1  | CDKAL1     | CDKAL1      | T2D                    |
| rs1569699  | passed        | 6   | 20787289 | 6p22.3 | CDKAL1  | CDKAL1     | CDKAL1      | T2D                    |
| rs7756992  | failed        | 6   | 20787688 | 6p22.3 | CDKAL1  | CDKAL1     | CDKAL1      | T2D                    |
| rs2206736  | passed        | 6   | 20791961 | 6p22.3 | CDKAL1  | CDKAL1     | CDKAL1      | T2D                    |
| rs6911357  | failed        | 6   | 20798290 | 6p22.3 | CDKAL1  | CDKAL1     | CDKAL1      | T2D                    |
| rs2206735  | failed        | 6   | 20802573 | 6p22.3 | CDKAL1  | CDKAL1     | CDKAL1      | T2D                    |
| rs3749925  | passed        | 6   | 20820440 | 6p22.3 | CDKAL1  | CDKAL1     | CDKAL1      | T2D                    |
| rs13216165 | passed        | 6   | 20825100 | 6p22.3 | CDKAL1  | CDKAL1     | CDKAL1      | T2D                    |
| rs9368224  | passed        | 6   | 20827211 | 6p22.3 | CDKAL1  | CDKAL1     | CDKAL1      | T2D                    |
| rs9356747  | passed        | 6   | 20832986 | 6p22.3 | CDKAL1  | CDKAL1     | CDKAL1      | T2D                    |



**Supplementary Table 1** Continued

| SNP        | passed/failed | Chr | Position | Band   | Gene(s) | Gene(s)5kb | Gene(s)10kb | T1D, T2D or autoimmune |
|------------|---------------|-----|----------|--------|---------|------------|-------------|------------------------|
| rs7741604  | passed        | 6   | 20839503 | 6p22.3 | CDKAL1  | CDKAL1     | CDKAL1      | T2D                    |
| rs9465873  | passed        | 6   | 20841368 | 6p22.3 | CDKAL1  | CDKAL1     | CDKAL1      | T2D                    |
| rs12211466 | passed        | 6   | 20841433 | 6p22.3 | CDKAL1  | CDKAL1     | CDKAL1      | T2D                    |
| rs9368228  | passed        | 6   | 20845736 | 6p22.3 | CDKAL1  | CDKAL1     | CDKAL1      | T2D                    |
| rs9358363  | passed        | 6   | 20851931 | 6p22.3 | CDKAL1  | CDKAL1     | CDKAL1      | T2D                    |
| rs4710945  | failed        | 6   | 20853053 | 6p22.3 | CDKAL1  | CDKAL1     | CDKAL1      | T2D                    |
| rs7738382  | passed        | 6   | 20854215 | 6p22.3 | CDKAL1  | CDKAL1     | CDKAL1      | T2D                    |
| rs9465877  | passed        | 6   | 20860358 | 6p22.3 | CDKAL1  | CDKAL1     | CDKAL1      | T2D                    |
| rs10946405 | passed        | 6   | 20861420 | 6p22.3 | CDKAL1  | CDKAL1     | CDKAL1      | T2D                    |
| rs2819996  | passed        | 6   | 20863911 | 6p22.3 | CDKAL1  | CDKAL1     | CDKAL1      | T2D                    |
| rs7452218  | failed        | 6   | 20875450 | 6p22.3 | CDKAL1  | CDKAL1     | CDKAL1      | T2D                    |
| rs9348445  | passed        | 6   | 20918026 | 6p22.3 | CDKAL1  | CDKAL1     | CDKAL1      | T2D                    |
| rs7753109  | passed        | 6   | 20929468 | 6p22.3 | CDKAL1  | CDKAL1     | CDKAL1      | T2D                    |
| rs9460563  | failed        | 6   | 20932997 | 6p22.3 | CDKAL1  | CDKAL1     | CDKAL1      | T2D                    |
| rs9356756  | failed        | 6   | 20952130 | 6p22.3 | CDKAL1  | CDKAL1     | CDKAL1      | T2D                    |
| rs17234378 | passed        | 6   | 20952720 | 6p22.3 | CDKAL1  | CDKAL1     | CDKAL1      | T2D                    |
| rs4397214  | failed        | 6   | 20960793 | 6p22.3 | CDKAL1  | CDKAL1     | CDKAL1      | T2D                    |
| rs4236002  | failed        | 6   | 20962984 | 6p22.3 | CDKAL1  | CDKAL1     | CDKAL1      | T2D                    |
| rs12211628 | passed        | 6   | 20964570 | 6p22.3 | CDKAL1  | CDKAL1     | CDKAL1      | T2D                    |
| rs4712556  | passed        | 6   | 20964682 | 6p22.3 | CDKAL1  | CDKAL1     | CDKAL1      | T2D                    |
| rs5007237  | failed        | 6   | 20969205 | 6p22.3 | CDKAL1  | CDKAL1     | CDKAL1      | T2D                    |
| rs7749397  | passed        | 6   | 20974027 | 6p22.3 | CDKAL1  | CDKAL1     | CDKAL1      | T2D                    |
| rs9350294  | failed        | 6   | 20978072 | 6p22.3 | CDKAL1  | CDKAL1     | CDKAL1      | T2D                    |
| rs4077403  | passed        | 6   | 20984489 | 6p22.3 | CDKAL1  | CDKAL1     | CDKAL1      | T2D                    |
| rs4077405  | failed        | 6   | 20984662 | 6p22.3 | CDKAL1  | CDKAL1     | CDKAL1      | T2D                    |
| rs4712561  | failed        | 6   | 20986261 | 6p22.3 | CDKAL1  | CDKAL1     | CDKAL1      | T2D                    |
| rs6456382  | passed        | 6   | 21009290 | 6p22.3 | CDKAL1  | CDKAL1     | CDKAL1      | T2D                    |
| rs4710958  | passed        | 6   | 21018982 | 6p22.3 | CDKAL1  | CDKAL1     | CDKAL1      | T2D                    |

**Supplementary Table 1** Continued

| SNP        | passed/failed | Chr | Position | Band   | Gene(s) | Gene(s)5kb | Gene(s)10kb | T1D, T2D or autoimmune |
|------------|---------------|-----|----------|--------|---------|------------|-------------|------------------------|
| rs12190631 | failed        | 6   | 21020651 | 6p22.3 | CDKAL1  | CDKAL1     | CDKAL1      | T2D                    |
| rs16884302 | failed        | 6   | 21034296 | 6p22.3 | CDKAL1  | CDKAL1     | CDKAL1      | T2D                    |
| rs11970010 | failed        | 6   | 21038014 | 6p22.3 | CDKAL1  | CDKAL1     | CDKAL1      | T2D                    |
| rs11970030 | passed        | 6   | 21038092 | 6p22.3 | CDKAL1  | CDKAL1     | CDKAL1      | T2D                    |
| rs16884308 | failed        | 6   | 21041656 | 6p22.3 | CDKAL1  | CDKAL1     | CDKAL1      | T2D                    |
| rs4712569  | passed        | 6   | 21047359 | 6p22.3 | CDKAL1  | CDKAL1     | CDKAL1      | T2D                    |
| rs6922187  | failed        | 6   | 21059866 | 6p22.3 | CDKAL1  | CDKAL1     | CDKAL1      | T2D                    |
| rs4631270  | failed        | 6   | 21061204 | 6p22.3 | CDKAL1  | CDKAL1     | CDKAL1      | T2D                    |
| rs7775523  | failed        | 6   | 21063311 | 6p22.3 | CDKAL1  | CDKAL1     | CDKAL1      | T2D                    |
| rs201351   | passed        | 6   | 21094109 | 6p22.3 | CDKAL1  | CDKAL1     | CDKAL1      | T2D                    |
| rs201346   | passed        | 6   | 21097265 | 6p22.3 | CDKAL1  | CDKAL1     | CDKAL1      | T2D                    |
| rs201342   | failed        | 6   | 21102229 | 6p22.3 | CDKAL1  | CDKAL1     | CDKAL1      | T2D                    |
| rs449233   | passed        | 6   | 21105348 | 6p22.3 | CDKAL1  | CDKAL1     | CDKAL1      | T2D                    |
| rs1498426  | failed        | 6   | 21116132 | 6p22.3 | CDKAL1  | CDKAL1     | CDKAL1      | T2D                    |
| rs374654   | passed        | 6   | 21117087 | 6p22.3 | CDKAL1  | CDKAL1     | CDKAL1      | T2D                    |
| rs9465946  | failed        | 6   | 21117867 | 6p22.3 | CDKAL1  | CDKAL1     | CDKAL1      | T2D                    |
| rs1548145  | failed        | 6   | 21118547 | 6p22.3 | CDKAL1  | CDKAL1     | CDKAL1      | T2D                    |
| rs16884376 | failed        | 6   | 21122975 | 6p22.3 | CDKAL1  | CDKAL1     | CDKAL1      | T2D                    |
| rs201311   | failed        | 6   | 21124511 | 6p22.3 | CDKAL1  | CDKAL1     | CDKAL1      | T2D                    |
| rs10946425 | failed        | 6   | 21126634 | 6p22.3 | CDKAL1  | CDKAL1     | CDKAL1      | T2D                    |
| rs9465948  | passed        | 6   | 21132081 | 6p22.3 | CDKAL1  | CDKAL1     | CDKAL1      | T2D                    |
| rs201307   | passed        | 6   | 21133737 | 6p22.3 | CDKAL1  | CDKAL1     | CDKAL1      | T2D                    |
| rs6921781  | passed        | 6   | 21136038 | 6p22.3 | CDKAL1  | CDKAL1     | CDKAL1      | T2D                    |
| rs4710961  | passed        | 6   | 21139058 | 6p22.3 | CDKAL1  | CDKAL1     | CDKAL1      | T2D                    |
| rs201300   | passed        | 6   | 21141944 | 6p22.3 | CDKAL1  | CDKAL1     | CDKAL1      | T2D                    |
| rs12198160 | failed        | 6   | 21142726 | 6p22.3 | CDKAL1  | CDKAL1     | CDKAL1      | T2D                    |
| rs201298   | failed        | 6   | 21144118 | 6p22.3 | CDKAL1  | CDKAL1     | CDKAL1      | T2D                    |
| rs201297   | passed        | 6   | 21144658 | 6p22.3 | CDKAL1  | CDKAL1     | CDKAL1      | T2D                    |

**Supplementary Table 1** Continued

| SNP        | passed/failed | Chr | Position | Band   | Gene(s) | Gene(s)5kb | Gene(s)10kb | T1D, T2D or autoimmune |
|------------|---------------|-----|----------|--------|---------|------------|-------------|------------------------|
| rs9295488  | failed        | 6   | 21145593 | 6p22.3 | CDKAL1  | CDKAL1     | CDKAL1      | T2D                    |
| rs201312   | passed        | 6   | 21146814 | 6p22.3 | CDKAL1  | CDKAL1     | CDKAL1      | T2D                    |
| rs17662372 | failed        | 6   | 21148356 | 6p22.3 | CDKAL1  | CDKAL1     | CDKAL1      | T2D                    |
| rs10806930 | failed        | 6   | 21158291 | 6p22.3 | CDKAL1  | CDKAL1     | CDKAL1      | T2D                    |
| rs16884468 | failed        | 6   | 21170765 | 6p22.3 | CDKAL1  | CDKAL1     | CDKAL1      | T2D                    |
| rs1001310  | failed        | 6   | 21173766 | 6p22.3 | CDKAL1  | CDKAL1     | CDKAL1      | T2D                    |
| rs4367364  | passed        | 6   | 21184599 | 6p22.3 | CDKAL1  | CDKAL1     | CDKAL1      | T2D                    |
| rs4599624  | passed        | 6   | 21186666 | 6p22.3 | CDKAL1  | CDKAL1     | CDKAL1      | T2D                    |
| rs10080639 | failed        | 6   | 21187063 | 6p22.3 | CDKAL1  | CDKAL1     | CDKAL1      | T2D                    |
| rs4310041  | passed        | 6   | 21187610 | 6p22.3 | CDKAL1  | CDKAL1     | CDKAL1      | T2D                    |
| rs7750461  | failed        | 6   | 21187688 | 6p22.3 | CDKAL1  | CDKAL1     | CDKAL1      | T2D                    |
| rs4323302  | passed        | 6   | 21189185 | 6p22.3 | CDKAL1  | CDKAL1     | CDKAL1      | T2D                    |
| rs9366376  | failed        | 6   | 21189629 | 6p22.3 | CDKAL1  | CDKAL1     | CDKAL1      | T2D                    |
| rs12200487 | passed        | 6   | 21196061 | 6p22.3 | CDKAL1  | CDKAL1     | CDKAL1      | T2D                    |
| rs6456395  | passed        | 6   | 21196650 | 6p22.3 | CDKAL1  | CDKAL1     | CDKAL1      | T2D                    |
| rs6939622  | failed        | 6   | 21202717 | 6p22.3 | CDKAL1  | CDKAL1     | CDKAL1      | T2D                    |
| rs4454125  | passed        | 6   | 21202933 | 6p22.3 | CDKAL1  | CDKAL1     | CDKAL1      | T2D                    |
| rs7744319  | passed        | 6   | 21207331 | 6p22.3 | CDKAL1  | CDKAL1     | CDKAL1      | T2D                    |
| rs4712584  | passed        | 6   | 21210536 | 6p22.3 | CDKAL1  | CDKAL1     | CDKAL1      | T2D                    |
| rs11968036 | passed        | 6   | 21211436 | 6p22.3 | CDKAL1  | CDKAL1     | CDKAL1      | T2D                    |
| rs4130302  | failed        | 6   | 21212138 | 6p22.3 | CDKAL1  | CDKAL1     | CDKAL1      | T2D                    |
| rs6936205  | failed        | 6   | 21214087 | 6p22.3 | CDKAL1  | CDKAL1     | CDKAL1      | T2D                    |
| rs9356763  | failed        | 6   | 21216145 | 6p22.3 | CDKAL1  | CDKAL1     | CDKAL1      | T2D                    |
| rs4340995  | failed        | 6   | 21223279 | 6p22.3 | CDKAL1  | CDKAL1     | CDKAL1      | T2D                    |
| rs4389757  | passed        | 6   | 21226218 | 6p22.3 | CDKAL1  | CDKAL1     | CDKAL1      | T2D                    |
| rs4076112  | passed        | 6   | 21228748 | 6p22.3 | CDKAL1  | CDKAL1     | CDKAL1      | T2D                    |
| rs4479917  | passed        | 6   | 21231967 | 6p22.3 | CDKAL1  | CDKAL1     | CDKAL1      | T2D                    |
| rs7750839  | failed        | 6   | 21234866 | 6p22.3 | CDKAL1  | CDKAL1     | CDKAL1      | T2D                    |

**Supplementary Table 1** Continued

| SNP        | passed/failed | Chr | Position | Band   | Gene(s) | Gene(s)5kb | Gene(s)10kb | T1D, T2D or autoimmune |
|------------|---------------|-----|----------|--------|---------|------------|-------------|------------------------|
| rs9295494  | passed        | 6   | 21239291 | 6p22.3 | CDKAL1  | CDKAL1     | CDKAL1      | T2D                    |
| rs9348456  | failed        | 6   | 21251345 | 6p22.3 | CDKAL1  | CDKAL1     | CDKAL1      | T2D                    |
| rs17835633 | failed        | 6   | 21252098 | 6p22.3 | CDKAL1  | CDKAL1     | CDKAL1      | T2D                    |
| rs10498701 | passed        | 6   | 21252578 | 6p22.3 | CDKAL1  | CDKAL1     | CDKAL1      | T2D                    |
| rs1466340  | failed        | 6   | 21254245 | 6p22.3 | CDKAL1  | CDKAL1     | CDKAL1      | T2D                    |
| rs7752602  | passed        | 6   | 21258436 | 6p22.3 | CDKAL1  | CDKAL1     | CDKAL1      | T2D                    |
| rs9295497  | passed        | 6   | 21262775 | 6p22.3 | CDKAL1  | CDKAL1     | CDKAL1      | T2D                    |
| rs4712586  | passed        | 6   | 21265017 | 6p22.3 | CDKAL1  | CDKAL1     | CDKAL1      | T2D                    |
| rs6931316  | failed        | 6   | 21266252 | 6p22.3 | CDKAL1  | CDKAL1     | CDKAL1      | T2D                    |
| rs9465981  | failed        | 6   | 21282590 | 6p22.3 | CDKAL1  | CDKAL1     | CDKAL1      | T2D                    |
| rs12526391 | passed        | 6   | 21284103 | 6p22.3 | CDKAL1  | CDKAL1     | CDKAL1      | T2D                    |
| rs9465982  | passed        | 6   | 21286261 | 6p22.3 | CDKAL1  | CDKAL1     | CDKAL1      | T2D                    |
| rs9295501  | failed        | 6   | 21290957 | 6p22.3 | CDKAL1  | CDKAL1     | CDKAL1      | T2D                    |
| rs9465985  | failed        | 6   | 21293569 | 6p22.3 | CDKAL1  | CDKAL1     | CDKAL1      | T2D                    |
| rs9465989  | passed        | 6   | 21295996 | 6p22.3 | CDKAL1  | CDKAL1     | CDKAL1      | T2D                    |
| rs9465991  | failed        | 6   | 21299907 | 6p22.3 | CDKAL1  | CDKAL1     | CDKAL1      | T2D                    |
| rs7748091  | passed        | 6   | 21304976 | 6p22.3 | CDKAL1  | CDKAL1     | CDKAL1      | T2D                    |
| rs9465993  | passed        | 6   | 21305669 | 6p22.3 | CDKAL1  | CDKAL1     | CDKAL1      | T2D                    |
| rs3793090  | passed        | 6   | 21306062 | 6p22.3 | CDKAL1  | CDKAL1     | CDKAL1      | T2D                    |
| rs1459047  | failed        | 6   | 21308369 | 6p22.3 | CDKAL1  | CDKAL1     | CDKAL1      | T2D                    |
| rs9465994  | passed        | 6   | 21309472 | 6p22.3 | CDKAL1  | CDKAL1     | CDKAL1      | T2D                    |
| rs12527588 | passed        | 6   | 21312801 | 6p22.3 | CDKAL1  | CDKAL1     | CDKAL1      | T2D                    |
| rs6902505  | passed        | 6   | 21316195 | 6p22.3 | CDKAL1  | CDKAL1     | CDKAL1      | T2D                    |
| rs1563728  | passed        | 6   | 21317978 | 6p22.3 | CDKAL1  | CDKAL1     | CDKAL1      | T2D                    |
| rs12664336 | failed        | 6   | 21318882 | 6p22.3 | CDKAL1  | CDKAL1     | CDKAL1      | T2D                    |
| rs9358400  | passed        | 6   | 21321286 | 6p22.3 | CDKAL1  | CDKAL1     | CDKAL1      | T2D                    |
| rs10214694 | passed        | 6   | 21321533 | 6p22.3 | CDKAL1  | CDKAL1     | CDKAL1      | T2D                    |
| rs6913136  | failed        | 6   | 21323380 | 6p22.3 | CDKAL1  | CDKAL1     | CDKAL1      | T2D                    |



**Supplementary Table 1** Continued

| SNP        | passed/failed | Chr | Position  | Band    | Gene(s)                | Gene(s)5kb             | Gene(s)10kb                      | T1D, T2D or autoimmune |
|------------|---------------|-----|-----------|---------|------------------------|------------------------|----------------------------------|------------------------|
| rs4710965  | passed        | 6   | 21326649  | 6p22.3  | CDKAL1                 | CDKAL1                 | CDKAL1                           | T2D                    |
| rs6937610  | passed        | 6   | 21327416  | 6p22.3  | CDKAL1                 | CDKAL1                 | CDKAL1                           | T2D                    |
| rs12203389 | passed        | 6   | 21328510  | 6p22.3  | CDKAL1                 | CDKAL1                 | CDKAL1                           | T2D                    |
| rs12191541 | passed        | 6   | 21328818  | 6p22.3  | CDKAL1                 | CDKAL1                 | CDKAL1                           | T2D                    |
| rs7770752  | failed        | 6   | 21332496  | 6p22.3  | CDKAL1                 | CDKAL1                 | CDKAL1                           | T2D                    |
| rs6942273  | passed        | 6   | 21333556  | 6p22.3  | CDKAL1                 | CDKAL1                 | CDKAL1                           | T2D                    |
| rs9466006  | failed        | 6   | 21333618  | 6p22.3  | CDKAL1                 | CDKAL1                 | CDKAL1                           | T2D                    |
| rs4710966  | passed        | 6   | 21336867  | 6p22.3  | CDKAL1                 | CDKAL1                 | CDKAL1                           | T2D                    |
| rs9460611  | passed        | 6   | 21338815  | 6p22.3  | CDKAL1                 | CDKAL1                 | CDKAL1                           | T2D                    |
| rs9460612  | passed        | 6   | 21338986  | 6p22.3  | CDKAL1                 | CDKAL1                 | CDKAL1                           | T2D                    |
| rs1563727  | failed        | 6   | 21339453  | 6p22.3  | CDKAL1                 | CDKAL1                 | CDKAL1                           | T2D                    |
| rs2280714  | failed        | 7   | 128381961 | 7q32.1  |                        | TNPO3 IRF5             | TNPO3 IRF5                       | autoimmune             |
| rs11761231 | passed        | 7   | 131020579 | 7q32.3  |                        | hCG_19809              | hCG_19809                        | autoimmune             |
| rs12547741 | failed        | 8   | 118217864 | 8q24.11 | SLC30A8                | SLC30A8                | SLC30A8                          | T2D                    |
| rs11989843 | passed        | 8   | 118220174 | 8q24.11 | SLC30A8                | SLC30A8                | SLC30A8                          | T2D                    |
| rs17738231 | passed        | 8   | 118225531 | 8q24.11 | SLC30A8                | SLC30A8                | SLC30A8                          | T2D                    |
| rs4876369  | passed        | 8   | 118232685 | 8q24.11 | SLC30A8                | SLC30A8                | SLC30A8                          | T2D                    |
| rs7001168  | passed        | 8   | 118239433 | 8q24.11 | SLC30A8                | SLC30A8                | SLC30A8                          | T2D                    |
| rs2466298  | passed        | 8   | 118252839 | 8q24.11 | SLC30A8                | SLC30A8                | SLC30A8                          | T2D                    |
| rs2466296  | passed        | 8   | 118253308 | 8q24.11 | SLC30A8                | SLC30A8                | SLC30A8                          | T2D                    |
| rs13266634 | passed        | 8   | 118253964 | 8q24.11 | SLC30A8                | SLC30A8                | SLC30A8                          | T2D                    |
| rs3802178  | failed        | 8   | 118254139 | 8q24.11 | SLC30A8                | SLC30A8                | SLC30A8                          | T2D                    |
| rs2466295  | failed        | 8   | 118254222 | 8q24.11 | SLC30A8                | SLC30A8                | SLC30A8                          | T2D                    |
| rs2466293  | failed        | 8   | 118255119 | 8q24.11 | SLC30A8                | SLC30A8                | SLC30A8                          | T2D                    |
| rs10282940 | passed        | 8   | 118257007 | 8q24.11 | SLC30A8                | SLC30A8                | SLC30A8                          | T2D                    |
| rs3217992  | passed        | 9   | 21993223  | 9p21.3  | RP11-145E5.4<br>CDKN2B | RP11-145E5.4<br>CDKN2B | RP11-145E5.4<br>CDKN2A<br>CDKN2B | T2D                    |
| rs1063192  | failed        | 9   | 21993367  | 9p21.3  | RP11-145E5.4<br>CDKN2B | RP11-145E5.4<br>CDKN2B | RP11-145E5.4<br>CDKN2A<br>CDKN2B | T2D                    |

**Supplementary Table 1** Continued

| SNP        | passed/failed | Chr | Position  | Band     | Gene(s)                | Gene(s)5kb             | Gene(s)10kb                         | T1D, T2D or autoimmune |
|------------|---------------|-----|-----------|----------|------------------------|------------------------|-------------------------------------|------------------------|
| rs3217986  | passed        | 9   | 21995330  | 9p21.3   | RP11-145E5.4<br>CDKN2B | RP11-145E5.4<br>CDKN2B | RP11-145E5.4<br>CDKN2B              | T2D                    |
| rs2069422  | failed        | 9   | 21998026  | 9p21.3   | RP11-145E5.4<br>CDKN2B | RP11-145E5.4<br>CDKN2B | RP11-145E5.4<br>CDKN2B              | T2D                    |
| rs564398   | failed        | 9   | 22019547  | 9p21.3   | RP11-145E5.4           | RP11-145E5.4           | RP11-145E5.4                        | T2D                    |
| rs10811661 | passed        | 9   | 22124094  | 9p21.3   |                        |                        |                                     | T2D                    |
| rs10118357 | passed        | 9   | 122719889 | 9q33.2   | TRAF1                  | TRAF1                  | TRAF1                               | autoimmune             |
| rs3761847  | failed        | 9   | 122730060 | 9q33.2   | TRAF1                  | TRAF1                  | TRAF1                               | autoimmune             |
| rs10761659 | passed        | 10  | 64115570  | 10q21.2  |                        |                        |                                     | autoimmune             |
| rs1248696  | failed        | 10  | 79286611  | 10q22.3  | DLG5                   | DLG5                   | DLG5                                | autoimmune             |
| rs2275729  | failed        | 10  | 94442410  | 10q23.33 | HHEX                   | HHEX                   | HHEX                                | T2D                    |
| rs1111875  | passed        | 10  | 94452862  | 10q23.33 |                        |                        | HHEX                                | T2D                    |
| rs7923837  | failed        | 10  | 94471897  | 10q23.33 |                        |                        |                                     | T2D                    |
| rs10883365 | failed        | 10  | 101277754 | 10q24.2  |                        | NKX2-3                 | NKX2-3                              | autoimmune             |
| rs2419598  | failed        | 10  | 113596288 | 10q25.2  |                        |                        |                                     | T2D                    |
| rs7903146  | failed        | 10  | 114748339 | 10q25.2  | TCF7L2                 | TCF7L2                 | TCF7L2                              | T2D                    |
| rs12255372 | failed        | 10  | 114798892 | 10q25.2  | TCF7L2                 | TCF7L2                 | TCF7L2                              | T2D                    |
| rs870849   | passed        | 12  | 6757281   | 12p13.31 | LAG3                   | LAG3                   | LAG3 PTMS                           | autoimmune             |
| rs7308505  | passed        | 12  | 54614966  | 12q13.2  | DGKA                   | DGKA                   | LOC10012908<br>7 DGKA<br>WIBG       | T1D                    |
| rs1052165  | passed        | 12  | 54637613  | 12q13.2  | SILV                   | DGKA SILV              | CDK2 DGKA<br>SILV                   | T1D                    |
| rs12309895 | failed        | 12  | 54645352  | 12q13.2  | SILV                   | CDK2 SILV              | CDK2<br>RAB5B SILV                  | T1D                    |
| rs2069408  | failed        | 12  | 54650588  | 12q13.2  | CDK2                   | CDK2<br>RAB5B SILV     | LOC10013129<br>4 CDK2<br>RAB5B SILV | T1D                    |
| rs2069414  | failed        | 12  | 54651966  | 12q13.2  | CDK2                   | CDK2<br>RAB5B          | LOC10013129<br>4 CDK2<br>RAB5B SILV | T1D                    |
| rs17528736 | failed        | 12  | 54654785  | 12q13.2  | RAB5B                  | CDK2<br>RAB5B          | LOC10013129<br>4 CDK2<br>RAB5B SILV | T1D                    |

**Supplementary Table 1** Continued

| SNP        | passed/failed | Chr | Position | Band    | Gene(s)                | Gene(s)5kb             | Gene(s)10kb                    | T1D, T2D or autoimmune |
|------------|---------------|-----|----------|---------|------------------------|------------------------|--------------------------------|------------------------|
| rs17118206 | failed        | 12  | 54665565 | 12q13.2 | LOC10013129<br>4 RAB5B | LOC10013129<br>4 RAB5B | LOC10013129<br>4 RAB5B         | T1D                    |
| rs773126   | passed        | 12  | 54681687 | 12q13.2 | SUOX                   | LOC10013129<br>4 SUOX  | LOC10013129<br>4 RAB5B<br>SUOX | T1D                    |
| rs10876864 | passed        | 12  | 54687352 | 12q13.2 |                        | SUOX                   | LOC10013129<br>4 SUOX          | T1D                    |
| rs772921   | failed        | 12  | 54689844 | 12q13.2 |                        | SUOX                   | IKZF4 SUOX                     | T1D                    |
| rs2658479  | passed        | 12  | 54703670 | 12q13.2 | IKZF4                  | IKZF4                  | IKZF4                          | T1D                    |
| rs12580100 | passed        | 12  | 54725476 | 12q13.2 |                        | RPS26                  | RPS26 IKZF4                    | T1D                    |
| rs1508211  | failed        | 12  | 54762569 | 12q13.2 | ERBB3                  | ERBB3                  | ERBB3                          | T1D                    |
| rs2271195  | failed        | 12  | 54763756 | 12q13.2 | ERBB3                  | ERBB3                  | ERBB3                          | T1D                    |
| rs2271194  | passed        | 12  | 54763961 | 12q13.2 | ERBB3                  | ERBB3                  | ERBB3                          | T1D                    |
| rs705708   | passed        | 12  | 54775180 | 12q13.2 | ERBB3                  | ERBB3                  | ERBB3<br>PA2G4                 | T1D                    |
| rs773123   | failed        | 12  | 54781265 | 12q13.2 | ERBB3                  | ERBB3<br>PA2G4         | ERBB3<br>PA2G4                 | T1D                    |
| rs11171747 | passed        | 12  | 54804675 | 12q13.2 |                        | FAM62A<br>ZC3H10       | FAM62A<br>RPL41<br>ZC3H10      | T1D                    |
| rs3809134  | failed        | 12  | 54832278 | 12q13.2 |                        | MYL6B                  | MYL6B<br>FAM62A<br>MYL6        | T1D                    |
| rs773643   | passed        | 12  | 54861455 | 12q13.2 | SMARCC2                | SMARCC2                | SMARCC2                        | T1D                    |
| rs7977273  | passed        | 12  | 54869911 | 12q13.2 |                        | SMARCC2                | SMARCC2                        | T1D                    |
| rs10747763 | failed        | 12  | 54889333 | 12q13.2 | RNF41                  | RNF41                  | RNF41                          | T1D                    |
| rs1274495  | passed        | 12  | 54902634 | 12q13.2 | OBFC2B                 | RNF41<br>OBFC2B        | RNF41<br>SLC39A5<br>OBFC2B     | T1D                    |
| rs17118403 | passed        | 12  | 54916334 | 12q13.2 | SLC39A5                | ANKRD52<br>SLC39A5     | ANKRD52<br>SLC39A5<br>OBFC2B   | T1D                    |
| rs1148555  | failed        | 12  | 56204901 | 12q13.3 | MBD6                   | MBD6 DDIT3             | DCTN2<br>MBD6 DDIT3<br>MARS    | autoimmune             |
| rs730560   | passed        | 12  | 56224832 | 12q13.3 | DCTN2                  | DCTN2                  | DCTN2<br>KIF5A                 | autoimmune             |

**Supplementary Table 1** Continued

| SNP        | passed/failed | Chr | Position | Band    | Gene(s)  | Gene(s)5kb                  | Gene(s)10kb                            | T1D, T2D or autoimmune |
|------------|---------------|-----|----------|---------|----------|-----------------------------|----------------------------------------|------------------------|
| rs6581146  | failed        | 12  | 56232744 | 12q13.3 | KIF5A    | KIF5A                       | DCTN2<br>KIF5A                         | autoimmune             |
| rs775246   | passed        | 12  | 56261422 | 12q13.3 | KIF5A    | KIF5A                       | KIF5A<br>PIP4K2C                       | autoimmune             |
| rs1678536  | passed        | 12  | 56265457 | 12q13.3 | KIF5A    | KIF5A                       | KIF5A<br>PIP4K2C                       | autoimmune             |
| rs7313599  | passed        | 12  | 56265822 | 12q13.3 | KIF5A    | KIF5A                       | KIF5A<br>PIP4K2C                       | autoimmune             |
| rs1078109  | passed        | 12  | 56272633 | 12q13.3 | PIP4K2C  | PIP4K2C                     | KIF5A<br>PIP4K2C                       | autoimmune             |
| rs812315   | passed        | 12  | 56279757 | 12q13.3 | PIP4K2C  | PIP4K2C                     | DTX3<br>PIP4K2C                        | autoimmune             |
| rs2306390  | passed        | 12  | 56288866 | 12q13.3 | DTX3     | GEFT DTX3                   | GEFT DTX3<br>PIP4K2C                   | autoimmune             |
| rs1564374  | passed        | 12  | 56296430 | 12q13.3 | GEFT     | GEFT<br>SLC26A10            | GEFT DTX3<br>B4GALNT1<br>SLC26A10      | autoimmune             |
| rs11613457 | failed        | 12  | 56298500 | 12q13.3 |          | GEFT<br>SLC26A10            | GEFT DTX3<br>B4GALNT1<br>SLC26A10      | autoimmune             |
| rs12322482 | failed        | 12  | 56308341 | 12q14.1 | B4GALNT1 | B4GALNT1<br>SLC26A10        | B4GALNT1<br>SLC26A10                   | autoimmune             |
| rs2640629  | passed        | 12  | 56351715 | 12q14.1 |          |                             |                                        | autoimmune             |
| rs4760319  | failed        | 12  | 56373753 | 12q14.1 |          | OS9                         | OS9                                    | autoimmune             |
| rs1050045  | failed        | 12  | 56401538 | 12q14.1 | OS9      | LOC10013077<br>6 OS9 AGAP2  | LOC10013077<br>6 OS9 AGAP2             | autoimmune             |
| rs701008   | passed        | 12  | 56403912 | 12q14.1 | AGAP2    | LOC10013077<br>6 OS9 AGAP2  | LOC10013077<br>6 OS9 AGAP2             | autoimmune             |
| rs2301551  | passed        | 12  | 56410801 | 12q14.1 | AGAP2    | LOC10013077<br>6 AGAP2      | LOC10013077<br>6 OS9 AGAP2             | autoimmune             |
| rs12307841 | passed        | 12  | 56411705 | 12q14.1 | AGAP2    | LOC10013077<br>6 AGAP2      | LOC10013077<br>6 AGAP2                 | autoimmune             |
| rs4646537  | failed        | 12  | 56443548 | 12q14.1 | CYP27B1  | CYP27B1<br>METTL1<br>MARCH9 | CYP27B1<br>FAM119B<br>METTL1<br>MARCH9 | autoimmune             |
| rs8176345  | passed        | 12  | 56444825 | 12q14.1 | CYP27B1  | CYP27B1<br>METTL1<br>MARCH9 | CYP27B1<br>FAM119B<br>METTL1<br>MARCH9 | autoimmune             |



## Supplementary Table 1 Continued

| SNP        | passed/failed | Chr | Position | Band    | Gene(s)                 | Gene(s)5kb                      | Gene(s)10kb                     | T1D, T2D or autoimmune |
|------------|---------------|-----|----------|---------|-------------------------|---------------------------------|---------------------------------|------------------------|
| rs17565804 | passed        | 12  | 56462687 | 12q14.1 |                         | TSM<br>FAM119B                  | TSM<br>FAM119B                  | autoimmune             |
| rs10877020 | failed        | 12  | 56474281 | 12q14.1 | TSM                     | TSM AVIL                        | TSM AVIL                        | autoimmune             |
| rs12582311 | passed        | 12  | 56489531 | 12q14.1 | AVIL                    | AVIL                            | AVIL                            | autoimmune             |
| rs11172349 | passed        | 12  | 56498795 | 12q14.1 |                         | LOC10013467<br>0 CTDSP2<br>AVIL | LOC10013467<br>0 CTDSP2<br>AVIL | autoimmune             |
| rs10783853 | passed        | 12  | 56520529 | 12q14.1 | LOC10013467<br>0 CTDSP2 | LOC10013467<br>0 CTDSP2         | LOC10013467<br>0 CTDSP2         | autoimmune             |
| rs1599750  | failed        | 12  | 56528812 | 12q14.1 |                         | LOC10013467<br>0 CTDSP2         | LOC10013467<br>0 CTDSP2         | autoimmune             |
| rs7312623  | passed        | 12  | 56548790 | 12q14.1 |                         |                                 |                                 | autoimmune             |
| rs4760341  | passed        | 12  | 56567762 | 12q14.1 |                         |                                 |                                 | autoimmune             |
| rs17119991 | passed        | 12  | 56575963 | 12q14.1 |                         |                                 |                                 | autoimmune             |
| rs7977734  | passed        | 12  | 56587329 | 12q14.1 |                         |                                 |                                 | autoimmune             |
| rs4630335  | passed        | 12  | 56588525 | 12q14.1 |                         |                                 |                                 | autoimmune             |
| rs10877035 | passed        | 12  | 56607785 | 12q14.1 |                         |                                 |                                 | autoimmune             |
| rs17568156 | passed        | 12  | 56631611 | 12q14.1 | XRCC6BP1                | XRCC6BP1                        | XRCC6BP1                        | autoimmune             |
| rs4760347  | failed        | 12  | 56633135 | 12q14.1 | XRCC6BP1                | XRCC6BP1                        | XRCC6BP1                        | autoimmune             |
| rs10783861 | failed        | 12  | 56644208 | 12q14.1 |                         |                                 | XRCC6BP1                        | autoimmune             |
| rs1506888  | passed        | 12  | 56683240 | 12q14.1 |                         |                                 |                                 | autoimmune             |
| rs10747790 | passed        | 12  | 56692096 | 12q14.1 |                         |                                 |                                 | autoimmune             |
| rs17492255 | passed        | 12  | 56697077 | 12q14.1 |                         |                                 |                                 | autoimmune             |
| rs12368865 | failed        | 12  | 56708909 | 12q14.1 |                         |                                 |                                 | autoimmune             |
| rs4354731  | passed        | 12  | 56764865 | 12q14.1 |                         |                                 |                                 | autoimmune             |
| rs2260688  | passed        | 12  | 56764956 | 12q14.1 |                         |                                 |                                 | autoimmune             |
| rs2733449  | passed        | 12  | 56775580 | 12q14.1 |                         |                                 |                                 | autoimmune             |
| rs12809238 | passed        | 12  | 56785214 | 12q14.1 |                         |                                 |                                 | autoimmune             |
| rs2939817  | failed        | 12  | 56803267 | 12q14.1 |                         |                                 |                                 | autoimmune             |
| rs9738727  | passed        | 12  | 56818624 | 12q14.1 |                         |                                 |                                 | autoimmune             |
| rs1109125  | passed        | 12  | 56820511 | 12q14.1 |                         |                                 |                                 | autoimmune             |

**Supplementary Table 1** Continued

| SNP        | passed/failed | Chr | Position  | Band     | Gene(s)  | Gene(s)5kb           | Gene(s)10kb                      | T1D, T2D or autoimmune |
|------------|---------------|-----|-----------|----------|----------|----------------------|----------------------------------|------------------------|
| rs7297872  | failed        | 12  | 56823617  | 12q14.1  |          |                      |                                  | autoimmune             |
| rs7967135  | passed        | 12  | 56831898  | 12q14.1  |          |                      |                                  | autoimmune             |
| rs1587686  | failed        | 12  | 56834102  | 12q14.1  |          |                      |                                  | autoimmune             |
| rs11172479 | passed        | 12  | 56843001  | 12q14.1  |          |                      |                                  | autoimmune             |
| rs12426565 | passed        | 12  | 56844571  | 12q14.1  |          |                      |                                  | autoimmune             |
| rs11172482 | failed        | 12  | 56846693  | 12q14.1  |          |                      |                                  | autoimmune             |
| rs17120410 | failed        | 12  | 56848558  | 12q14.1  |          |                      |                                  | autoimmune             |
| rs10161493 | passed        | 12  | 56849198  | 12q14.1  |          |                      |                                  | autoimmune             |
| rs7304461  | failed        | 12  | 110953538 | 12q24.13 | C12orf30 | C12orf30             | ERP29<br>C12orf30                | T1D                    |
| rs12298022 | passed        | 12  | 110955473 | 12q24.13 | C12orf30 | C12orf30             | C12orf30                         | T1D                    |
| rs17696736 | passed        | 12  | 110971201 | 12q24.13 | C12orf30 | C12orf30             | C12orf30                         | T1D                    |
| rs7958564  | failed        | 12  | 110991239 | 12q24.13 | C12orf30 | C12orf30             | C12orf30                         | T1D                    |
| rs4767364  | passed        | 12  | 111005831 | 12q24.13 | C12orf30 | C12orf30             | C12orf30                         | T1D                    |
| rs7304572  | failed        | 12  | 111009456 | 12q24.13 | C12orf30 | C12orf30             | C12orf30                         | T1D                    |
| rs3087456  | failed        | 16  | 10878403  | 16p13.13 |          | CIITA                | CIITA                            | autoimmune             |
| rs17221417 | failed        | 16  | 49297083  | 16q12.1  | NOD2     | NOD2                 | NOD2                             | autoimmune             |
| rs2066845  | failed        | 16  | 49314041  | 16q12.1  | NOD2     | NOD2                 | NOD2                             | autoimmune             |
| rs8050136  | failed        | 16  | 52373776  | 16q12.2  | FTO      | FTO                  | FTO                              | T2D                    |
| rs9939609  | passed        | 16  | 52378028  | 16q12.2  | FTO      | FTO                  | FTO                              | T2D                    |
| rs8050910  | passed        | 16  | 83696674  | 16q24.1  | FAM92B   | FAM92B               | FAM92B                           | autoimmune             |
| rs6502867  | passed        | 17  | 5361052   | 17p13.2  | NLRP1    | NLRP1                | NLRP1                            | autoimmune             |
| rs2670660  | failed        | 17  | 5459730   | 17p13.2  |          |                      |                                  | autoimmune             |
| rs8182352  | passed        | 17  | 5495711   | 17p13.2  |          |                      |                                  | autoimmune             |
| rs4430796  | failed        | 17  | 33172153  | 17q12    | HNF1B    | HNF1B                | HNF1B                            | T2D                    |
| rs28514842 | failed        | 17  | 36657791  | 17q21.2  | KRTAP9-9 | KRTAP9-9<br>KRTAP9-4 | KRTAP9-9<br>KRTAP9-8<br>KRTAP9-4 | autoimmune             |
| rs734232   | passed        | 17  | 70277326  | 17q25.1  |          | NAT9<br>SLC9A3R1     | NAT9<br>TMEM104<br>SLC9A3R1      | autoimmune             |

**Supplementary Table 1** Continued

| SNP       | passed/failed | Chr | Position | Band     | Gene(s)  | Gene(s)5kb                  | Gene(s)10kb                     | T1D, T2D or autoimmune |
|-----------|---------------|-----|----------|----------|----------|-----------------------------|---------------------------------|------------------------|
| rs2305214 | failed        | 17  | 70280565 | 17q25.1  | NAT9     | NAT9<br>TMEM104<br>SLC9A3R1 | NAT9<br>TMEM104<br>SLC9A3R1     | autoimmune             |
| rs1564864 | failed        | 17  | 76256640 | 17q25.3  | KIAA1303 | KIAA1303                    | KIAA1303                        | autoimmune             |
| rs869190  | failed        | 17  | 76283188 | 17q25.3  | KIAA1303 | KIAA1303                    | KIAA1303                        | autoimmune             |
| rs2542151 | passed        | 18  | 12769947 | 18p11.21 |          |                             | PTPN2                           | T1D                    |
| rs6110460 | passed        | 20  | 156168   | 20p13    | DEFB129  | DEFB129                     | DEFB129                         | autoimmunity           |
| rs512625  | passed        | 20  | 3596378  | 20p13    |          | GFRA4<br>ADAM33             | GFRA4<br>ADAM33                 | autoimmunity           |
| rs2787094 | failed        | 20  | 3597161  | 20p13    | ADAM33   | ADAM33                      | GFRA4<br>ADAM33                 | autoimmunity           |
| rs6053417 | failed        | 20  | 5395617  | 20p12.3  |          | LOC643406                   | LOC643406                       | autoimmune             |
| rs2268277 | passed        | 21  | 35103919 | 21q22.12 | RUNX1    | RUNX1                       | RUNX1                           | autoimmune             |
| rs2836754 | passed        | 21  | 39213610 | 21q22.2  | FLJ45139 | FLJ45139                    | FLJ45139                        | autoimmune             |
| rs2070766 | failed        | 22  | 22567221 | 22q11.23 | MIF      | MIF                         | LOC10013170<br>2 MIF<br>SLC2A11 | autoimmune             |
| rs4821544 | passed        | 22  | 35588449 | 22q12.3  | NCF4     | NCF4                        | NCF4                            | autoimmune             |
| rs729749  | passed        | 22  | 35593792 | 22q12.3  | NCF4     | NCF4                        | NCF4                            | autoimmune             |

Passed/failed – indicates whether the SNP was successfully genotyped in the families.

Gene region column indicates the genes in the 5kb or 10kb interval flanking the SNP.
